# Supplementary material for: Hedgehog signaling via its ligand DHH acts as cell fate determinant during skeletal muscle regeneration
Source: PubMed Central journal article supplement (PMC10290686; doi:10.1038/s41467-023-39506-1), 2023-06-24
Supplement: 41467_2023_39506_MOESM1_ESM.pdf [file 41467_2023_39506_MOESM1_ESM.pdf]

## **Hedgehog signaling via its ligand DHH acts as cell fate determinant during skeletal muscle regeneration**

Alessandra M. Norris<sup>1</sup>, Ambili Bai Appu<sup>1</sup>, Connor D. Johnson<sup>1</sup>, Lylybell Y. Zhou<sup>1</sup>, David W. McKellar<sup>2</sup>, Marie-Ange Renault<sup>3</sup>, David Hammers<sup>1</sup>, Benjamin D. Cosgrove<sup>2</sup> and Daniel Kopinke<sup>1\*</sup>.

<sup>1</sup>Department of Pharmacology and Therapeutics, Myology Institute, University of Florida, Gainesville, FL, USA.

<sup>2</sup>Meinig School of Biomedical Engineering, Cornell University, Ithaca, NY, USA

<sup>3</sup>Biology of Cardiovascular Diseases, INSERM, University of Bordeaux, Pessac, France

\*Correspondence: [dkopinke@ufl.edu](mailto:dkopinke@ufl.edu)

### **Supplemental Figures and Table**

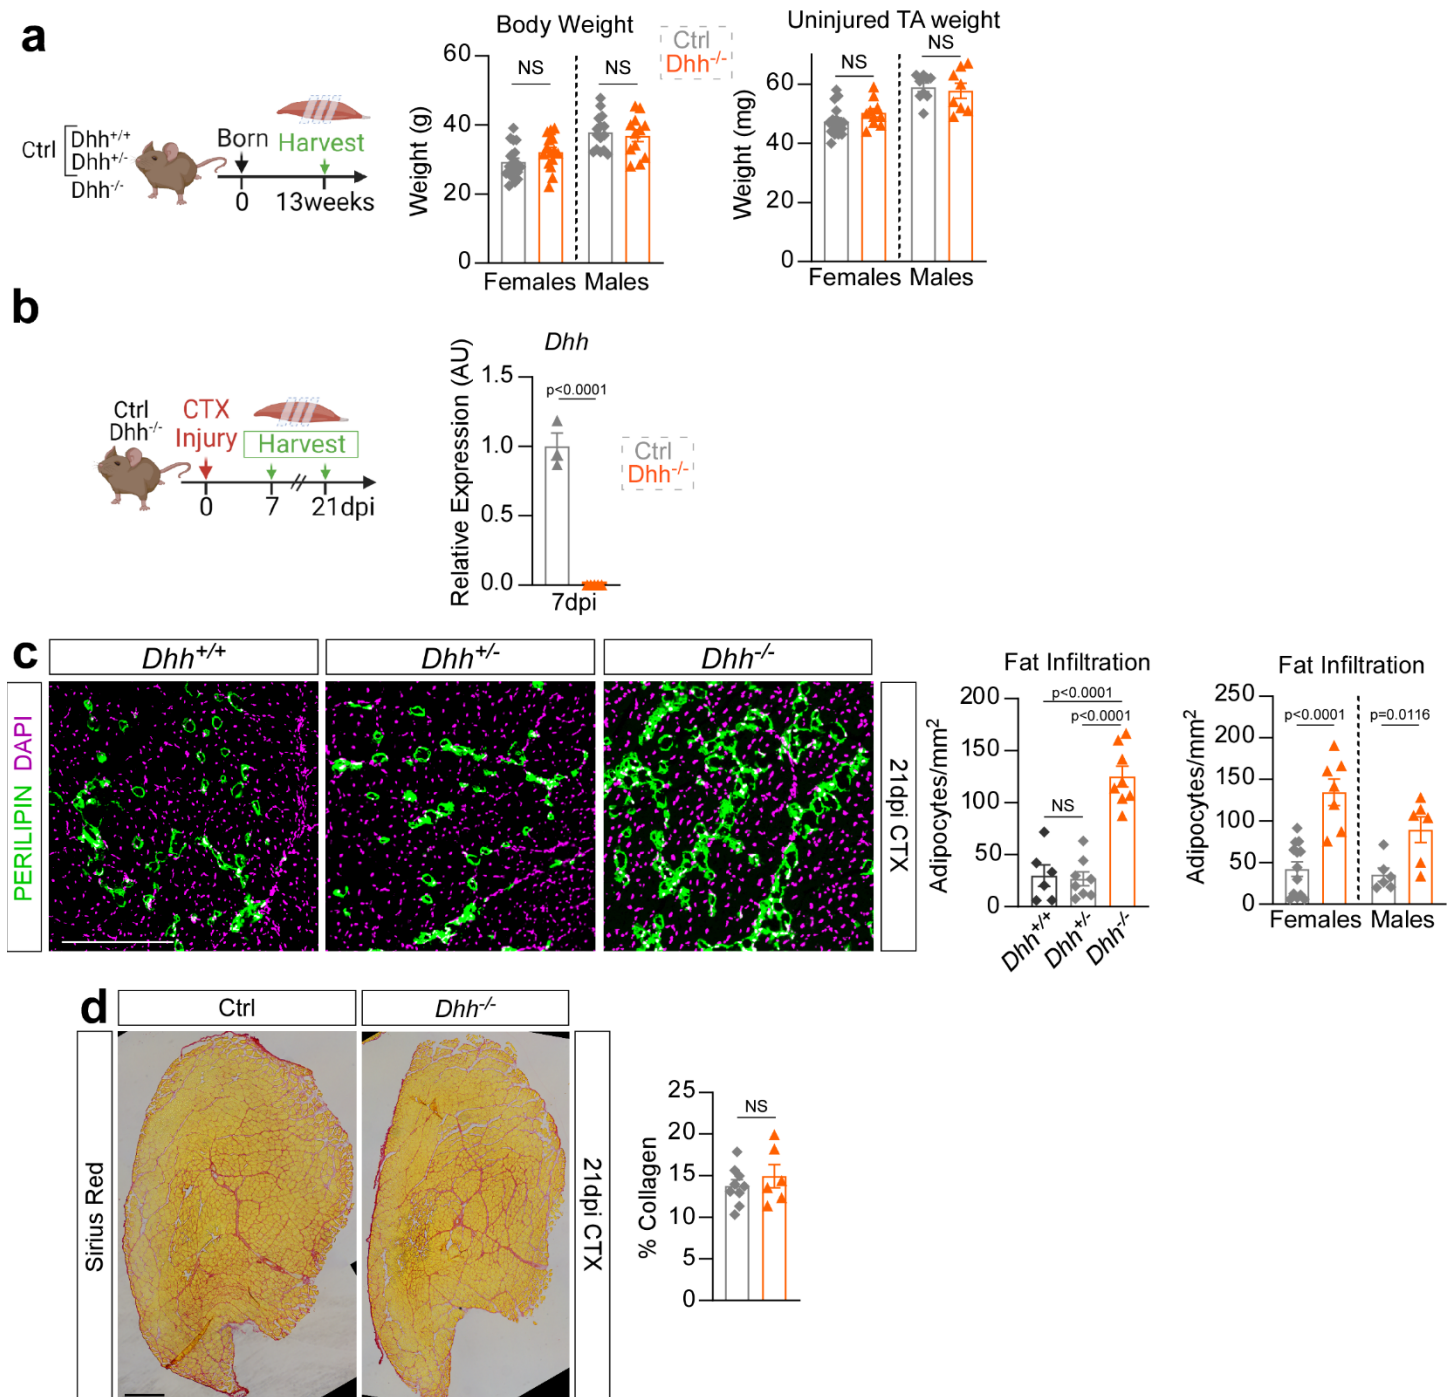

**Supplemental Figure 1. Validation of the *Dhh*<sup>-/-</sup> mouse model.**

**a**) Experimental outline. Body weight (g) of 13-week-old *Dhh*<sup>-/-</sup> (females, n=15 mice; males, n=12 mice) and ctrl mice (females, n=19 mice; males n=15 mice). Wet-weight of uninjured TAs (mg) of *Dhh*<sup>-/-</sup> (females, n=10 TAs; males, n=8 TAs) and ctrl mice (females, n=17 TAs; males n=9 TAs). **b**) Experimental outline. RT-qPCR of *Dhh* expression 7 days after CTX injury of *Dhh*<sup>-/-</sup> (n=5 TAs) and ctrl (n=3 TAs) mice. **c**) *Left*: Immunofluorescence of adipocytes (PERILIPIN<sup>+</sup>, green) 21 days post CTX injury of *Dhh*<sup>+/+</sup>, *Dhh*<sup>+/-</sup> and *Dhh*<sup>-/-</sup> mice. Nuclei were visualized with DAPI (purple). Scale bars: 250  $\mu$ m. *Right*: Quantification of adipocytes per injured area (mm<sup>2</sup>) 21 days post CTX injury in *Dhh*<sup>+/+</sup> (n=6 TAs), *Dhh*<sup>+/-</sup> (n=8 TAs) and *Dhh*<sup>-/-</sup> (n=8 TAs) mice. Adipocyte quantification of *Dhh*<sup>-/-</sup> and ctrl mice separated by females (*Dhh*<sup>-/-</sup> n=7 TAs; ctrl n=13 TAs) and males (*Dhh*<sup>-/-</sup> n=6 TAs; ctrl n=6 TAs). **d**) *Left*: Histological Sirius red staining 21 days post CTX injury in *Dhh*<sup>-/-</sup> and ctrl mice. Scale bars: 500  $\mu$ m. *Right*: Quantification of percent of collagen (red) over total TA area 21 dpi in *Dhh*<sup>-/-</sup> (n=6 TAs) and ctrl mice (n=9 TAs). All data are represented as mean  $\pm$  SEM. An unpaired two-tailed t test or a one-way ANOVA followed by a Dunnet's multiple comparison was used.

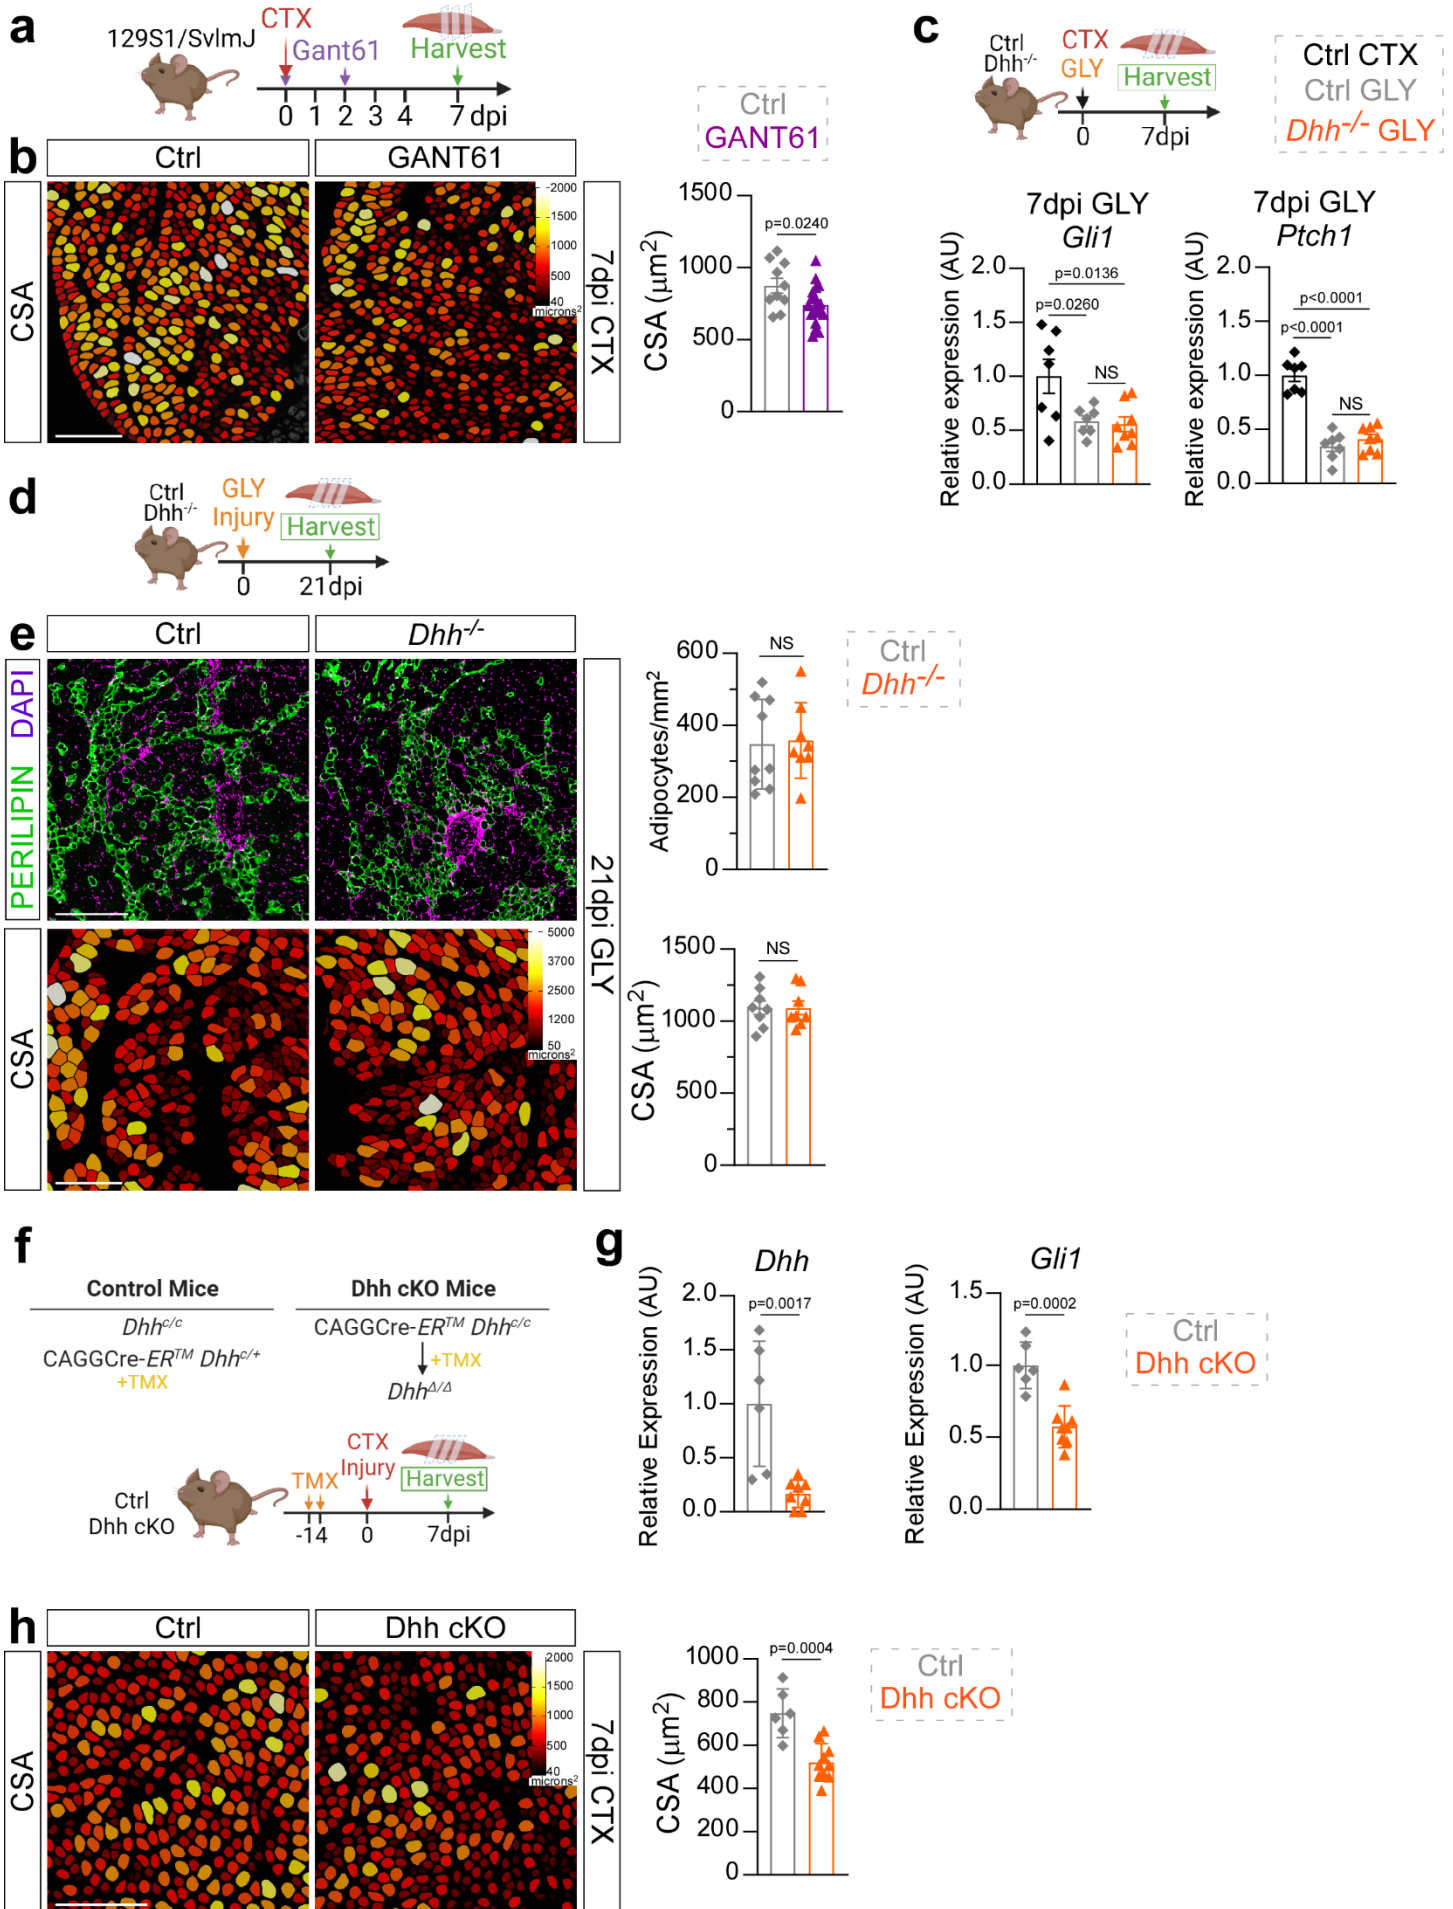

**Supplemental Figure 2. Validation of DHH loss of function data and Dhh cKO mouse model.**

**a)** Experimental outline. **b) Left:** Myofibers color-coded according to size ( $\mu\text{m}^2$ ) of Gant61- and vehicle treated mice 7 days post CTX injury. Scale bar: 250  $\mu\text{m}$ . **Right:** Average CSA ( $\mu\text{m}^2$ ) of vehicle (n=10 TAs) and Gant61 (n=19 TAs) treated mice 7 days post CTX. **c) Top:** Experimental outline. **Bottom:** RT-qPCR of expression of *Gli1* and *Ptch1* 7 days post CTX in ctrl (n=7 TAs); and 7 days post GLY injury in ctrl (n=7 TAs) and *Dhh*<sup>-/-</sup> (n=8 TAs) mice. **d)** Experimental outline. **e) Left:** Immunofluorescence of adipocytes (PERILIPIN<sup>+</sup>, green) and nuclei visualized with DAPI (purple); color-coded myofibers according to CSA of *Dhh*<sup>-/-</sup> and ctrl mice 21 days post GLY. Scale bars: 250  $\mu\text{m}$ . **Right:** Quantification of adipocytes per injured area ( $\text{mm}^2$ ) 21 days post GLY in *Dhh*<sup>-/-</sup> (n=8 TAs) and ctrl (n=9 TAs) mice. Average CSA ( $\mu\text{m}^2$ ) of *Dhh*<sup>-/-</sup> (n=8 TAs) and ctrl (n=8 TAs) mice 21 days after GLY injury. **f)** Experimental outline. **g)** RT-qPCR of expression of *Dhh* and *Gli1* 7 days post CTX in *Dhh* cKO (n=8 TAs) and ctrl (n=6 TAs) mice. **h) Left:** Color-coded myofibers according to CSA ( $\mu\text{m}^2$ ) of *Dhh* cKO and ctrl 7 days post CTX injury. Scale bar: 250  $\mu\text{m}$ . **Right:** Average CSA ( $\mu\text{m}^2$ ) of *Dhh* cKO (n=10 TAs) and ctrl (n=6 TAs) mice 7 days post CTX injury. All data are represented as mean  $\pm$  SEM. An unpaired two-tailed t test or a one-way ANOVA followed by a Dunnett's multiple comparison was used.

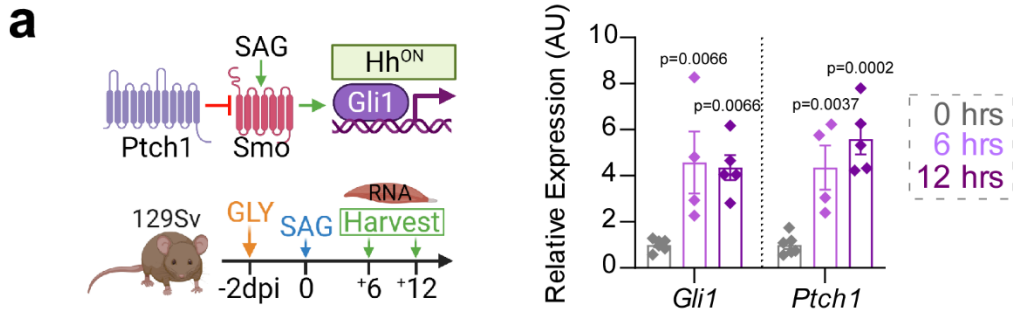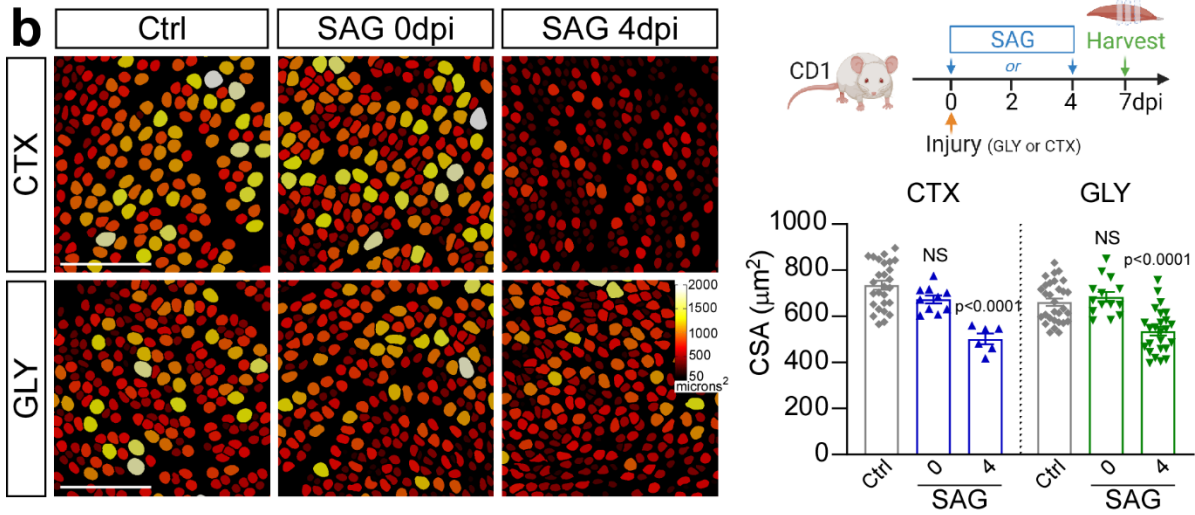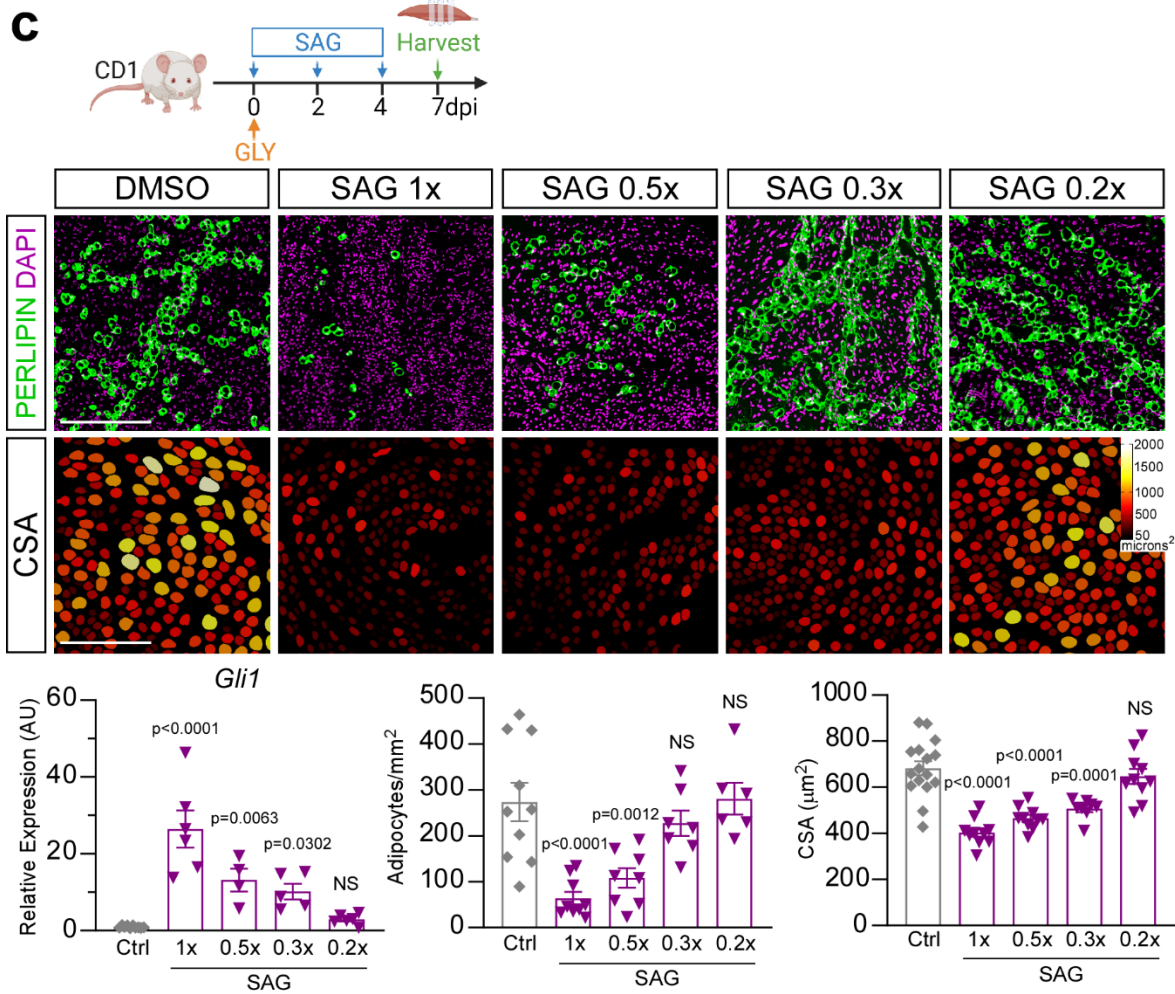

**Supplemental Figure 3. SAG influences adipogenesis and myogenesis in a dose- and time-dependent manner.**

**a) Left:** Experimental outline. **Right:** After 2 days post GLY injury, RT-qPCR of *Gli1* and *Ptch1* at 0 hrs (n=6 TAs), 6 hrs (n=4 TAs) and 12 hrs (n=5 TAs) following SAG administration. **b) Left:** Myofibers color-coded according to size ( $\mu\text{m}^2$ ) 7 days post CTX or GLY in ctrl and SAG- treated (at 0 dpi or 4 dpi) mice. Scale bar: 250  $\mu\text{m}$ . **Right:** Average CSA ( $\mu\text{m}^2$ ) 7 days post injury with vehicle control (CTX n=27 TAs & GLY n=30 TAs), SAG at 0 dpi (CTX: n=10 TAs & GLY: n=14 TAs) and SAG at 4 dpi (CTX: n=6 TAs & GLY: n=25 TAs). To note, these time points are part of the experiment described in the main Figure 3 and, thus, the same controls were used. **c) SAG** was administered at 0-, 2- and 4dpi at varying concentrations and TAs harvested at 7 days post GLY injury. Immunofluorescence of adipocytes (PERILIPIN<sup>+</sup>, green) and nuclei visualized with DAPI (purple). Color-coded myofibers based on cross sectional area (CSA). Scale bars: 250  $\mu\text{m}$ . **Bottom:** RT-qPCR of *Gli1* expression 7 days post GLY after treatment with DMSO control (n=10 TAs), SAG 1x (n=6 TAs), SAG 0.5x (n=4 TAs), SAG 0.3x (n=5 TAs) and SAG 0.2x (n=6 TAs). Quantification of adipocytes per injured area ( $\text{mm}^2$ ) 7 days post GLY injury of DMSO control (n=10 TAs), SAG 1x (n=9 TAs), SAG 0.5x (n=8 TAs), SAG 0.3x (n=7 TAs), and SAG 0.2x (n=6 TAs). Average CSA ( $\mu\text{m}^2$ ) 7 days after GLY injury of DMSO control (n=16 TAs), SAG 1x (n=10 TAs), SAG 0.5x (n=11 TAs), SAG 0.3x (n=8 TAs), and SAG 0.2x (n=10 TAs). All data are represented as mean  $\pm$  SEM. One- way ANOVA followed by a Dunnet's multiple comparison was used.

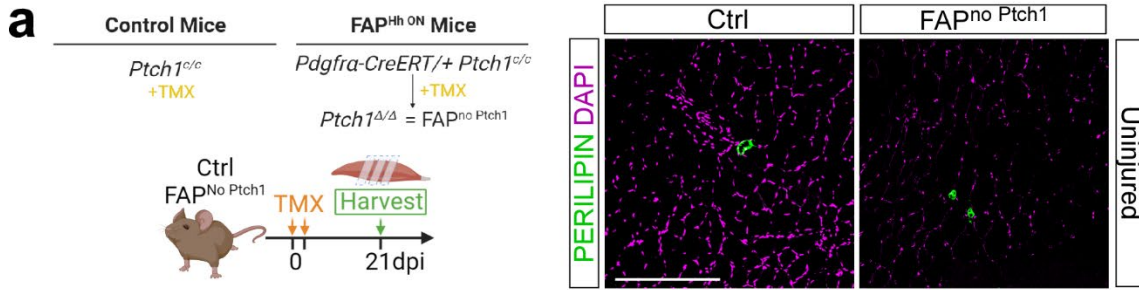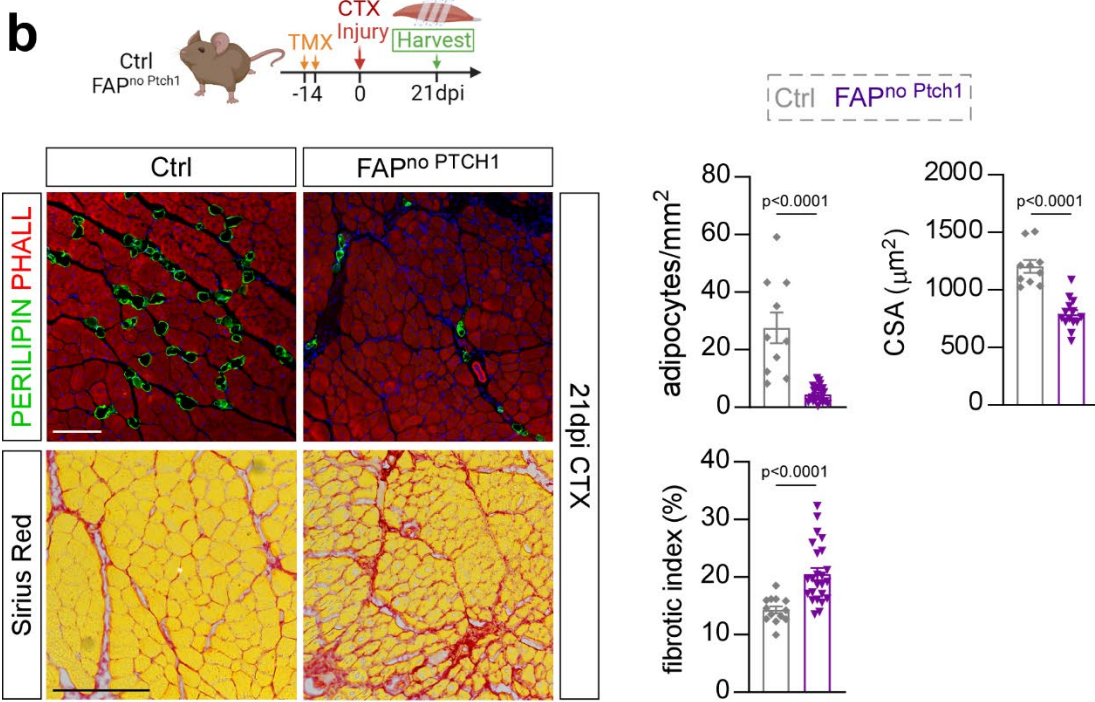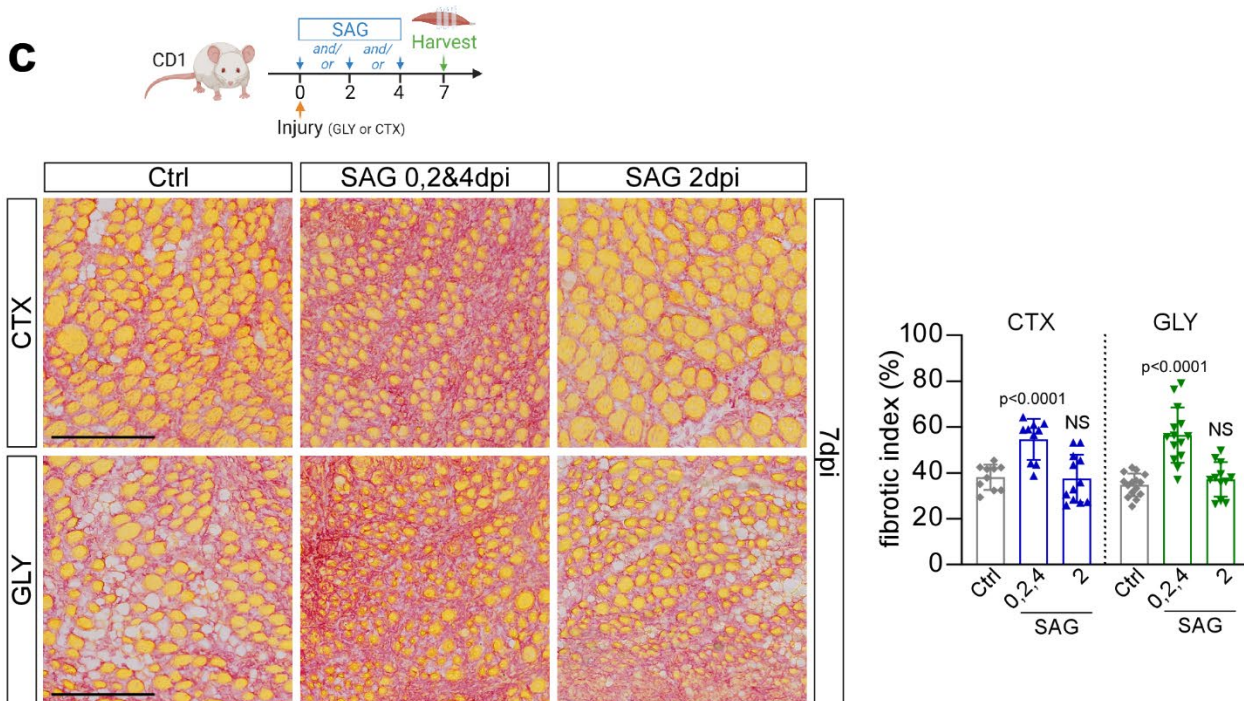

**Supplemental Figure 4. Genetic and pharmacological Hh activation prevents IMAT formation but causes fibrosis and impairs myogenesis.**

**a) Left:** Experimental outline. **Right:** Immunofluorescence of PERILIPIN<sup>+</sup> adipocytes (green) of uninjured FAP<sup>no P<sup>ch1</sup></sup> and control mice (n=5 for each). Scale bars: 250  $\mu$ m. **b)** Immunofluorescence of PERILIPIN<sup>+</sup> adipocytes (green) and PHALLOIDIN<sup>+</sup> myofibers (scale bar: 100  $\mu$ m) and histological Sirius red staining (scale bar: 250  $\mu$ m) 21 days post CTX injury in FAP<sup>no P<sup>ch1</sup></sup> and control mice. **Right:** Average CSA ( $\mu$ m<sup>2</sup>) 21 days post CTX of ctrl (n=10 TAs) and FAP<sup>no P<sup>ch1</sup></sup> (n=14 TAs) mice. Quantification of adipocytes per injured area (mm<sup>2</sup>) 21 days post CTX injury of ctrl (n=10 TAs) and FAP<sup>no P<sup>ch1</sup></sup> (n=22 TAs) mice. Quantification of percent of collagen (red) of total TA area 21 dpi CTX in FAP<sup>no P<sup>ch1</sup></sup> (n=19 TAs) and ctrl (n=24 TAs). **c) Left:** Sirius red staining 7 days after CTX (*top*) or GLY (*bottom*) injury after vehicle control, SAG at 0-, 2- and 4 dpi, or SAG at 2 dpi. Scale bars: 250  $\mu$ m. **Right:** Quantification of percent of Sirius red-positive collagen (red) over total TA area 7 days after injury from mice treated with vehicle control (CTX: n=10 TAs & GLY: n=15 TAs), SAG at 0-, 2- and 4 dpi (CTX: n=10 TAs & GLY: n=14 TAs) or SAG at 2 dpi (CTX & GLY: n=12 TAs). **c)** All data are represented as mean  $\pm$  SEM. An unpaired two-tailed t test or a one-way ANOVA followed by a Dunnet's multiple comparison was used.



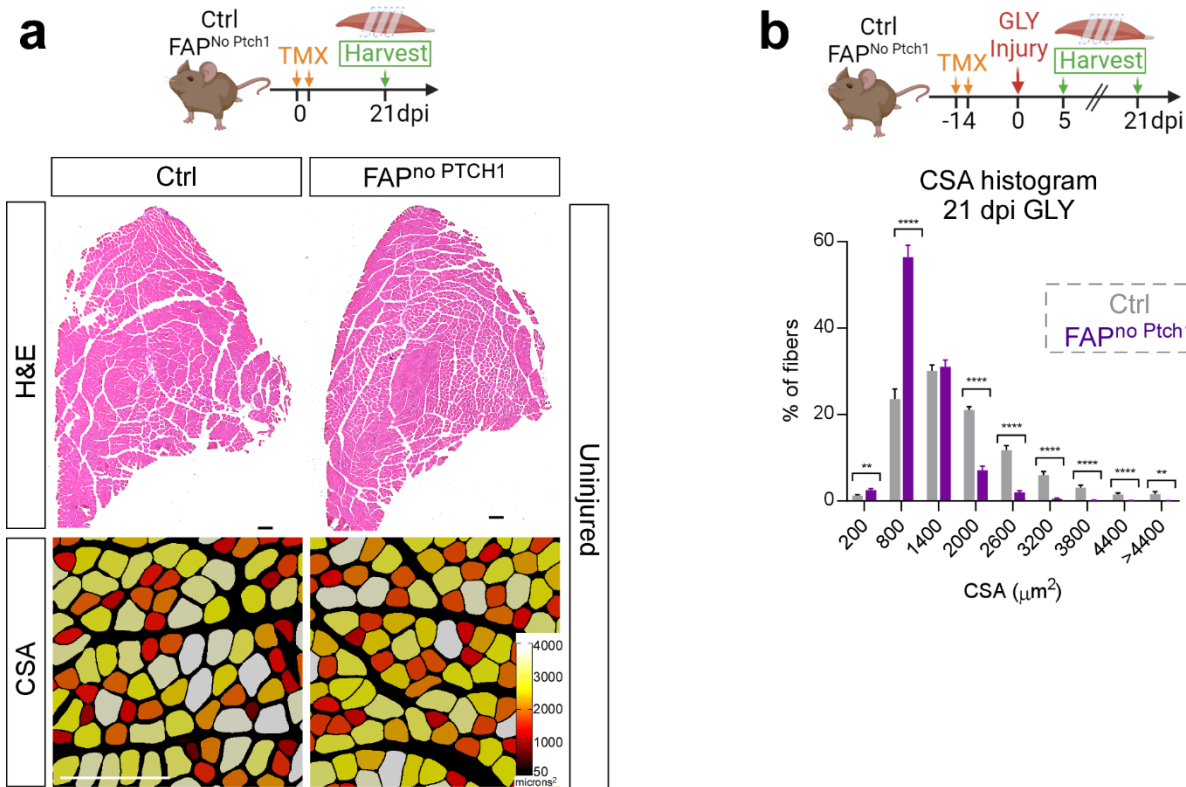

**Supplemental Figure 5. Ectopic Hh activation does not impact muscle homeostasis.**

**a)** Experimental outline. Color-coded myofibers based on cross sectional area (CSA) of uninjured FAP<sup>no Ptch1</sup> and control mice. Scale bar: 250  $\mu\text{m}$ . H&E staining of uninjured FAP<sup>no Ptch1</sup> and control mice. Scale bar: 500  $\mu\text{m}$ . **b)** *Top:* Experimental outline. *Middle:* Fiber number distribution, displayed as percent of total fibers, based on their CSA ( $\mu\text{m}^2$ ) in FAP<sup>no Ptch1</sup> (n=18) and ctrl mice (n=14) 21 days post GLY injury. Source data are provided as a Source Data file. All data are represented as mean  $\pm$  SEM. A two-way ANOVA followed by Tukey's multiple comparison test was used. A p value less than 0.05 was considered statistically significant where: \*\* p $\leq$  0.01, \*\*\* p $\leq$  0.001 and \*\*\*\* p $\leq$  0.0001. Source data are provided as a Source Data file.

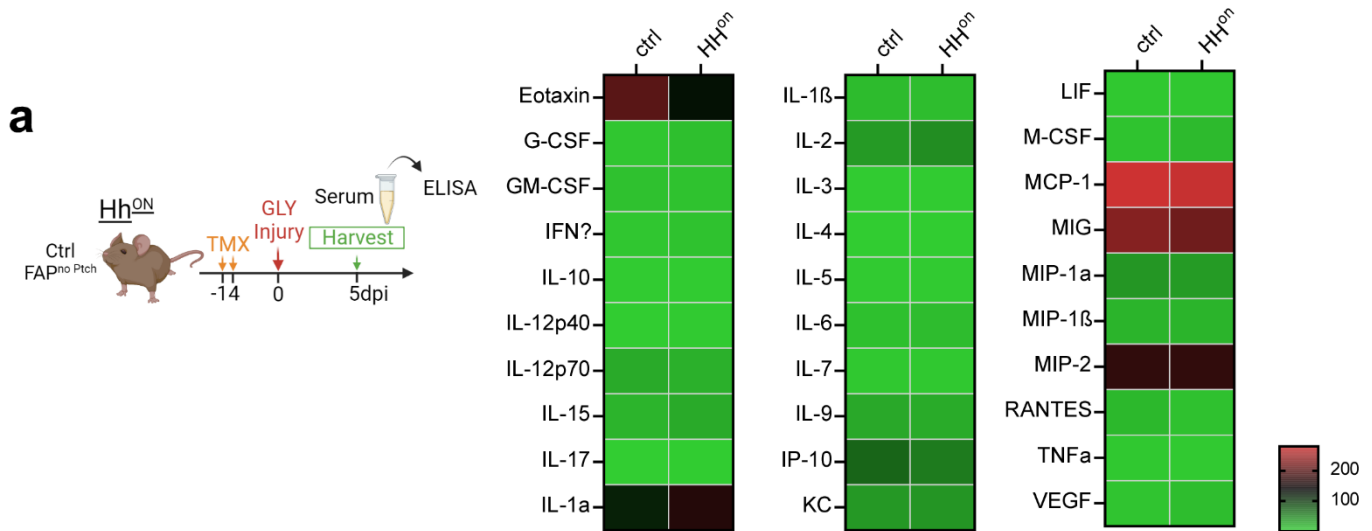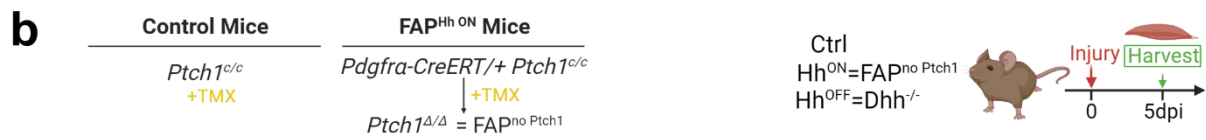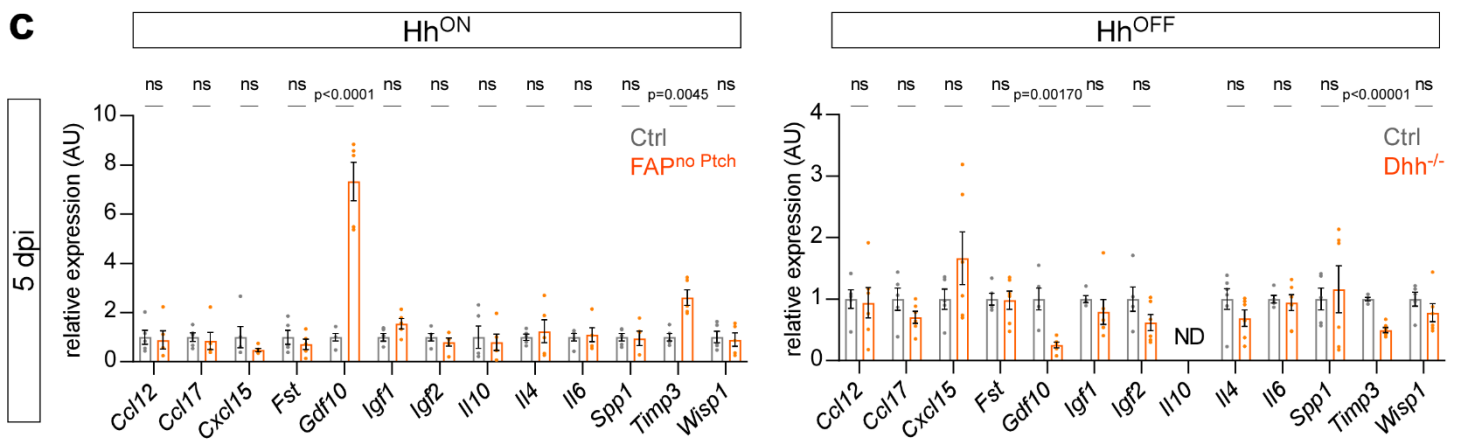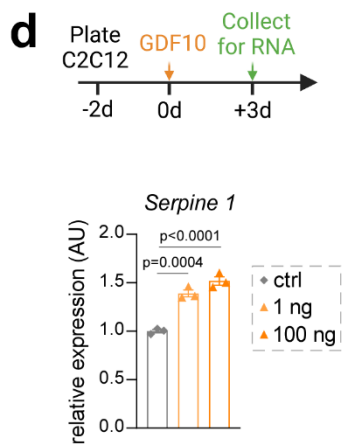

**Supplemental Figure 6. Screen for FAP-specific and Hh-induced factors that control adipogenesis and myogenesis.**

**a)** Enzyme-linked immunosorbent assay (ELISA) of whole muscle protein lysates from FAP<sup>no Ptch1</sup> and ctrl mice 5 days post GLY injury. **b)** Experimental outline. **c)** RT-qPCR of whole muscle RNA from FAP<sup>no Ptch1</sup> (n=5 TAs) and ctrls (n=5 TAs); and *Dhh*<sup>-/-</sup> (n=6 TAs) and ctrls (n=4-6) 5 days post injury for the known FAP targets: *Ccl2*, *Ccl7*, *Cxcl5*, *Fst*, *Gdf10*, *Igf1*, *Igf2*, *Il10*, *Il4*, *Spp1*, *Timp3* and *Wisp1*. **d)** RT-qPCR of *Serpine 1* from RNA isolated from C2C12 cells (n= 3 replicates per experimental group) 3 days after induction in ctrl versus rGDF10-treated cells (1 ng & 100 ng). All data are represented as mean ± SEM. A one-way ANOVA followed by a Dunnet's multiple comparison was used.

## Supplementary Table

**Supplementary Table 1: List of primers used for RT-qPCR**

| Gene             | Forward                    | Reverse                   |
|------------------|----------------------------|---------------------------|
| <i>Hprt</i>      | CATAACCTGGTTCATCATCGC      | TCCTCCTCAGACCGCTTTT       |
| <i>Pde12</i>     | ACCTTTTGGGTGCCAGTAGA       | CCAGAGGTCATCTGTCCTTCA     |
| <i>Dhh</i>       | CGATGGCTAGAGCGTTCAC        | GTACCCAAC TACAACCCCGA     |
| <i>Timp3</i>     | TAGACCAGAGTGCCAAAGGG       | CCAGGATGCCTTCTGCAAC       |
| <i>Gli1</i>      | GGTGCTGCCTATAGCCAGTGTCCCTC | GTGCCAATCCGGTGGAGTCAGACCC |
| <i>Ptch1</i>     | AATTCTCGACTCACTCGTCCA      | CTCCTCATATTTGGGGCCTT      |
| <i>Gdf10</i>     | CCAAATCCTTTGACGCCTACT      | GCTCTGACGATGCTCTGGAT      |
| <i>Acta2</i>     | GACAGAGGCACCACTGAACC       | ACAGCACAGCCTGAATAGCC      |
| <i>Ccl12</i>     | TTAAAAACCTGGATCGGAACCAA    | GCATTAGCTTCAGATTTACGGGT   |
| <i>Ccl17</i>     | GCTGCTTTCAGCATCCAAGTG      | CCAGGGACACCGACTACTG       |
| <i>Cxcl15</i>    | GTTCCATCTCGCCATTCATGC      | GCGGCTATGACTGAGGAAGG      |
| <i>Fst</i>       | GCCTCCTGCTGCTGCTACTC       | TTATACAGGACCTGGCAGCG      |
| <i>Igf1</i>      | CTGAGCTGGTGGATGCTCTT       | TCATCCACAATGCCTGTCTG      |
| <i>Igf2</i>      | GTGCTGCATCGCTGCTTAC        | ACGTCCCTCTCGGACTTGG       |
| <i>Il10</i>      | AGCATTTGAATTCCTGGGT        | TTTTCACAGGGGAGAAATCG      |
| <i>Il4</i>       | GGTCTCAACCCCCAGCTAGT       | GCCGATGATCTCTCTCAAGTGAT   |
| <i>Il6</i>       | TAGTCCTTCCTACCCCAATTTCC    | TTGGTCCTTAGCCACTCCTTC     |
| <i>Spp1</i>      | AGCAAGAACTCTTCCAAGCAA      | GTGAGATTCGTCAGATTCATCCG   |
| <i>Wisp1</i>     | GTGTGATGATGACGCAAGGA       | ATGCAGTTCTCATACCGTTGC     |
| <i>Serpine 1</i> | GTGAATGCCCTCTACTTCAGTG     | GCTGCCATCAGACTTGTGGAA     |
